# Supplementary material
Source: MDPI journal article supplement (https://www.mdpi.com/2674-0710/1/1/3)
Supplement: s1 [file s1]

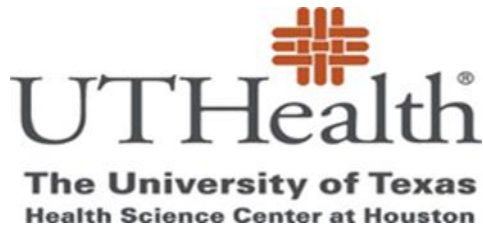

### **Interview Guide**

I am honored to be here with you and to see your Photovoice pictures and hear your story. The interview is for program evaluation purposes only, and its primary goal is to understand the lives and health needs of MSM refugees and asylum seekers. What questions do you have before we start?

When you describe to me what is in your photos, I may want to ask questions to clarify some of these Photovoice photos that you have chosen to show me to tell your story about how you came to be in Kenya and what your health and other related needs as a refugee are.

#### **A. Key Scenes in the Life Story**

Tell me about how you came to learn you were different or kuchu

- Tell me about your experience as a kuchu in your country
- Please tell me about what eventually made you decide to leave your country
- Would you please tell me about what caused you to flee to Kenya instead of the other places?
- What were your experiences as you traveled?
- Tell me a little about your experience of seeking asylum in Kenya?
- How did you find out about the possibility of seeking asylum based on sexual orientation?

#### **B. Challenges**

This next section considers the various health issues and problems you have faced while seeking healthcare

##### **Physical health**

What are the health problems you faced while you were in your country?

What are the health problems you have faced since being in Kenya?

##### **Mental health**

Before moving to Kenya, what caused you to be stressed, and how did you cope with these issues that highlighted you?

Since moving to Kenya, what has caused you to be stressed, and how have you coped with these issues that stressed you?

##### **Healthcare access**

How do you take care of your health problems?

What has been your experience seeking health care in Kenya?

What are the challenges facing LGBT refugees in Kenya?

What suggestions do you have to address the challenges LGBT refugees face in Kenya?

#### **C. Reflection**

Thank you for this interview. I want to get your feedback on how this interview has been like for you.

What were your thoughts and feelings during the interview?

What questions do you think I should have asked, and I did not?

##### **Prompts**

Tell me more about that?

Can you give me an example of that?
